# Supplementary material for: Self-absorption correction in calibration-free laser-induced breakdown spectroscopy for quantitative elemental profiling and chemometric classification of Spinacia oleracea
Source: Royal Society of Chemistry journal article supplement (doi:10.1039/d6ra01889k), 2026-06-01

**Table S1.** Spectral preprocessing parameters used in this work

| Parameter                  | Value                                              |
|----------------------------|----------------------------------------------------|
| Dark-current acquisition   | Avantes AvaSoft built-in routine, laser blocked    |
| Baseline algorithm         | Asymmetric least squares (AsLS); Eilers & Boelens  |
| AsLS smoothness $\lambda$  | $10^5$                                             |
| AsLS asymmetry $p$         | 0.001                                              |
| Smoothing filter           | Savitzky–Golay                                     |
| Smoothing window           | 7 points                                           |
| Smoothing polynomial order | 3                                                  |
| Peak-detection routine     | <code>scipy.signal.find_peaks</code> (SciPy v1.13) |
| NIST line-match tolerance  | $\pm 0.07$ nm                                      |
| Line profile fit           | Lorentzian (least-squares)                         |
| Instrumental broadening    | 0.07 nm (subtracted in quadrature for Stark)       |
| ML cross-validation        | Leave-One-Group-Out (per pellet)                   |
| Spectra per class          | 100 (5 pellets $\times$ 20 shots)                  |

**Figure S1.** Representative raw-to-processed LIBS spectra showing dark-current/background correction, baseline subtraction, smoothing, and final processed spectrum.

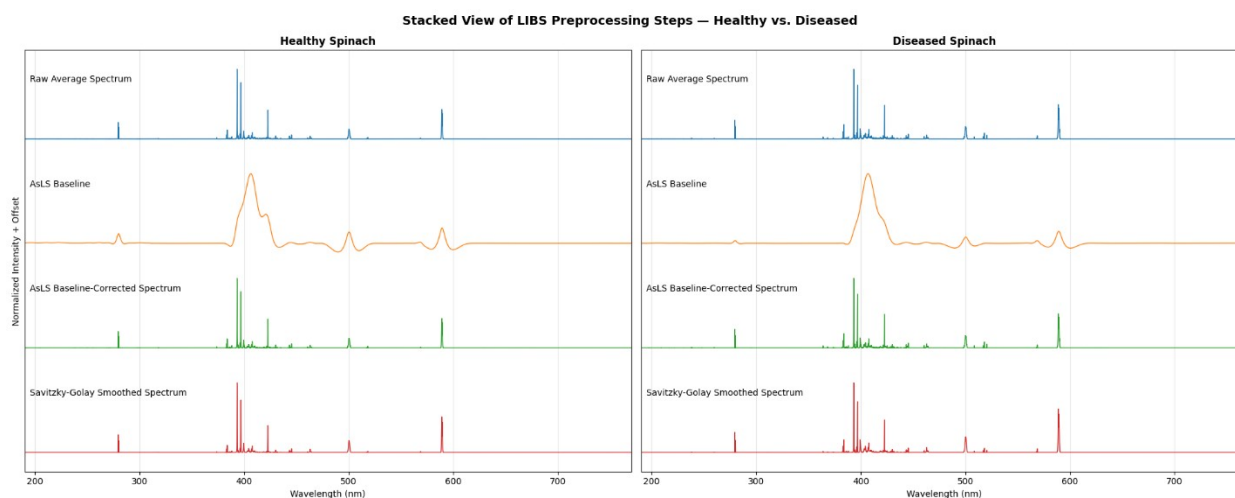

**Table S2.** Observed LIBS emission lines and NIST assignments within  $\pm 0.07$  nm.

| <b>Line</b>  | <b>NIST wavelength (nm)</b> | <b>Observed wavelength (nm)</b> |
|--------------|-----------------------------|---------------------------------|
| B I 249.67   | 249.67                      | 249.632                         |
| P I 253.56   | 253.56                      | 253.513                         |
| Mg II 279.55 | 279.55                      | 279.497                         |
| Mn I 279.83  | 279.83                      | 279.764                         |
| Mg II 280.27 | 280.27                      | 280.198                         |
| Si I 288.15  | 288.15                      | 288.126                         |
| Ca II 317.93 | 317.93                      | 317.978                         |
| Pb I 363.96  | 363.96                      | 363.966                         |
| Pb I 368.35  | 368.35                      | 368.340                         |
| Ca II 373.69 | 373.69                      | 373.711                         |
| Mg I 383.23  | 383.23                      | 383.187                         |
| Mg I 383.83  | 383.83                      | 383.774                         |
| Hg II 391.92 | 391.92                      | 391.925                         |
| Ca II 393.37 | 393.37                      | 393.304                         |
| Ti I 395.63  | 395.63                      | 395.590                         |
| Al I 396.15  | 396.15                      | 396.134                         |
| Ca II 396.85 | 396.85                      | 396.821                         |
| Mn I 403.31  | 403.31                      | 403.320                         |
| K I 404.41   | 404.41                      | 404.436                         |
| Fe I 407.17  | 407.17                      | 407.166                         |
| Fe I 407.62  | 407.62                      | 407.620                         |
| V I 409.54   | 409.54                      | 409.587                         |
| V I 409.97   | 409.97                      | 409.965                         |
| Ag II 411.18 | 411.18                      | 411.25                          |
| Ca I 422.67  | 422.67                      | 422.698                         |
| Cr I 425.43  | 425.43                      | 425.362                         |

|             |        |         |
|-------------|--------|---------|
| Cr I 428.97 | 428.97 | 428.930 |
| Cr I 430.11 | 430.11 | 430.120 |
| Hg I 435.83 | 435.83 | 435.785 |
| V I 443.45  | 443.45 | 443.428 |
| Ca I 445.48 | 445.48 | 445.410 |
| Ni I 460.62 | 460.62 | 460.626 |
| Zn I 462.98 | 462.98 | 463.009 |
| Zn I 468.01 | 468.01 | 468.032 |
| Zn I 481.05 | 481.05 | 481.071 |
| Fe I 500.20 | 500.20 | 500.195 |
| Cd I 508.58 | 508.58 | 508.592 |
| Mg I 517.27 | 517.27 | 517.210 |
| Mg I 518.36 | 518.36 | 518.330 |
| Cr I 520.45 | 520.45 | 520.470 |
| Na I 568.82 | 568.82 | 568.831 |
| Na I 588.99 | 588.99 | 588.970 |
| Na I 589.59 | 589.59 | 589.529 |

**Table S3.** Lorentzian fitting parameters pre and post IRSAC correction.

| <b>Line</b> | <b>Sample</b> | <b>self-absorbed center (nm)</b> | <b>Self-absorbed peak intensity</b> | <b>IRSAC-corrected peak intensity</b> | <b>IRSAC-corrected /self absorbed intensity ratio</b> |
|-------------|---------------|----------------------------------|-------------------------------------|---------------------------------------|-------------------------------------------------------|
| Na I 588.99 | Healthy       | 588.93667                        | 11418.42                            | 16275.03                              | 1.43                                                  |
| Na I 588.99 | Diseased      | 588.91655                        | 10391.90                            | 20538.96                              | 1.98                                                  |
| Na I 589.59 | Healthy       | 589.56211                        | 8996.25                             | 10870.95                              | 1.21                                                  |
| Na I 589.59 | Diseased      | 589.56595                        | 9029.08                             | 16972.09                              | 1.88                                                  |

|       |          |           |          |          |      |
|-------|----------|-----------|----------|----------|------|
| Mg II | Healthy  | 279.49035 | 2239.87  | 3442.17  | 1.54 |
| Mg II | Diseased | 279.48980 | 2586.35  | 3237.73  | 1.25 |
| Ca II | Healthy  | 393.32175 | 46747.04 | 77782.62 | 1.66 |
| Ca II | Diseased | 393.31831 | 38111.23 | 70272.80 | 1.84 |

**Figure S2.** Representative self-absorbed line profiles of (a) Na I 588.99/589.59 nm, (b) Ca II 393.366 nm and (c) Mg II 279.553 nm used to evaluate line-shape distortion before IRSAC correction.

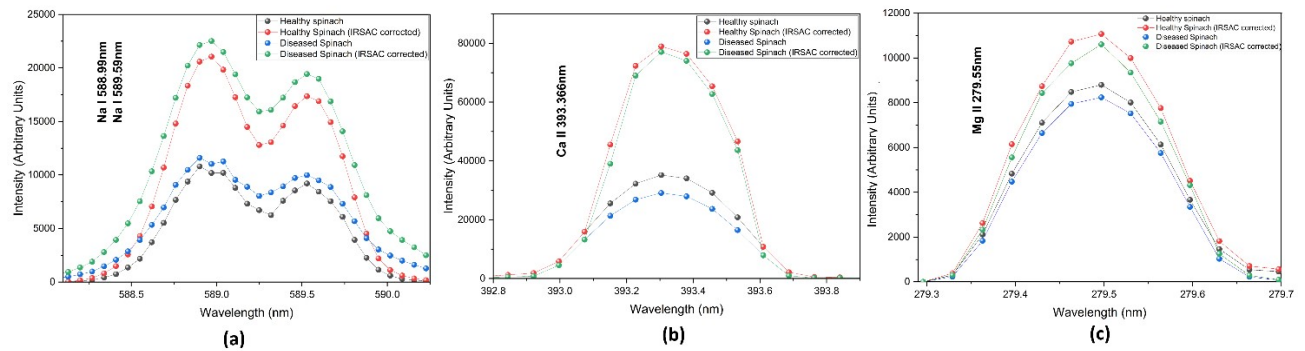

Supplement: d6ra01889k2.pdf [file d6ra01889k2.pdf]
